# Supplementary material for: Asymmetric Male Mating Success in Lek-Breeding Rhinella arenarum
Source: MDPI journal article supplement (doi:10.3390/ani12233268), 2022-11-24
Supplement: s1 [file s1]

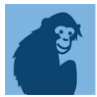

**Table S1.** Between-group variation of log10-normalized morphometric parameters in males with and without mating success. Groups were compared using an ANCOVA with SVL as a covariate. Data are given as least square means and corresponding standard error.

| Morphometric parameter              | Successful males (N=32) | Unsuccessful males (N=78) | Significance P |
|-------------------------------------|-------------------------|---------------------------|----------------|
| Snout-vent length (SVL)             | 1.9995±0.0068           | 1.9938±0.0044             | 0.4841         |
| head width (HW)                     | 1.5183±0.0027           | 1.5165±0.0017             | 0.5746         |
| snout-eye distance (ED)             | 1.3982±0.0026           | 1.3972±0.0016             | 0.7730         |
| eye-nostril distance (END)          | 1.2993±0.0033           | 1.2978±0.0021             | 0.6967         |
| internare distance (IND)            | 0.8683±0.0047           | 0.8641±0.0030             | 0.4536         |
| humerus length (HL)                 | 1.5329±0.0030           | 1.5235±0.0019             | <b>0.0083</b>  |
| radius length (RL)                  | 1.4333±0.0043           | 1.4241±0.0028             | 0.0730         |
| hand length (HND),                  | 1.3355±0.0041           | 1.3272±0.0026             | 0.0872         |
| length 3 <sup>rd</sup> finger (F3L) | 0.9444±0.0075           | 0.9201±0.0048             | <b>0.0075</b>  |
| femur length (FL)                   | 1.6168±0.0043           | 1.6113±0.0028             | 0.2870         |
| tibia length (TL)                   | 1.5989±0.0029           | 1.5932±0.0019             | 0.1036         |
| foot length (FOL)                   | 1.7653±0.0039           | 1.7639±0.0025             | 0.7613         |
| length 4 <sup>th</sup> toe (T4L)    | 1.5682±0.0039           | 1.5624±0.0025             | 0.2227         |
