# Supplementary material for: Asymmetric Male Mating Success in Lek-Breeding Rhinella arenarum
Source: MDPI journal article supplement (doi:10.3390/ani12233268), 2022-11-24

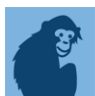

**Figure S1.** Seasonal temperature and rainfall variation at the study pond “Charca de las brujas” (4500 m<sup>2</sup> surface area, 33°06′42″ S; 64°18′15″ W, 428 m a.s.l.), located at the campus of the Universidad Nacional de Río Cuarto (Río Cuarto, Córdoba province, Argentina).

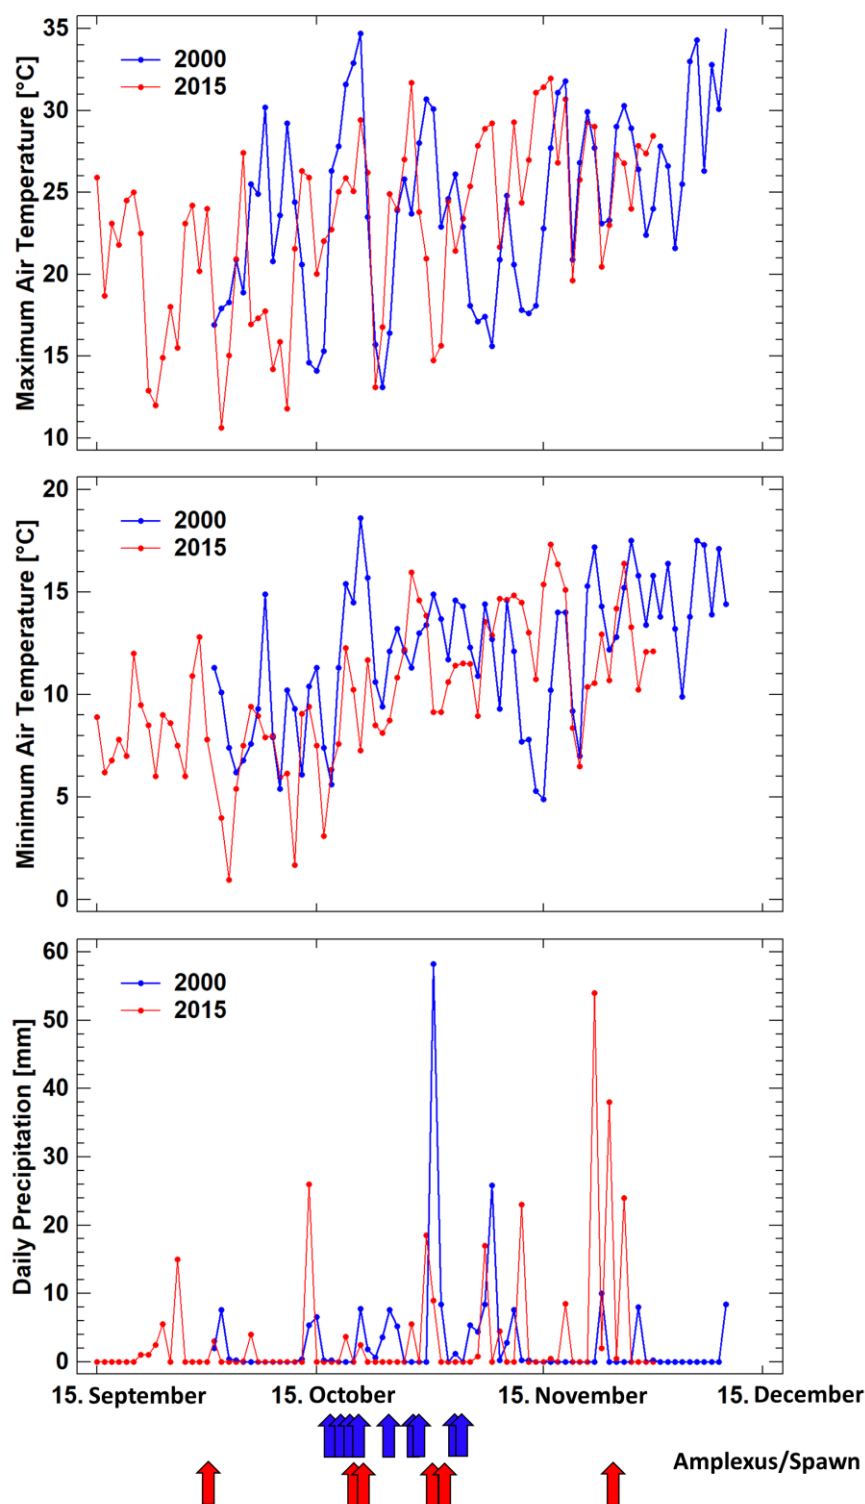

Supplement: s1 [file s1]
