# Supplementary material for: Asymmetric Male Mating Success in Lek-Breeding Rhinella arenarum
Source: MDPI journal article supplement (doi:10.3390/ani12233268), 2022-11-24
Supplement: s1 [file s1]

**Table S2.** Between-group variation of log10-normalized advertisement call parameters in males with and without mating success. Groups were compared using an ANCOVA with temperature as a covariate. Data are given as least square means and corresponding standard error.

| Bioacoustic parameter                     | Successful males<br>(N=11, 50 calls) | Unsuccessful males<br>(N=35, 155 calls) | Significance P     |
|-------------------------------------------|--------------------------------------|-----------------------------------------|--------------------|
| Call duration [ms]                        | 3.5914±0.0248                        | 3.5734±0.0137                           | 0.5322             |
| Number of pulse groups per call           | 1.7517±0.0238                        | 1.7704±0.0132                           | 0.5011             |
| Repetition rate of pulse groups [n per s] | 1.1603±0.0047                        | 1.1970±0.0026                           | <b>&lt;0.00001</b> |
| Pulse group duration [ms]                 |                                      |                                         |                    |
| 2 pulses per pulse group                  | 1.3685±0.0126                        | 1.3490±0.0072                           | 0.1928             |
| 3 pulses per pulse group                  | 1.4526±0.0069                        | 1.4191±0.0040                           | <b>&lt;0.00001</b> |
| 4 pulses per pulse group                  | 1.5057±0.0062                        | 1.4748±0.0039                           | <b>0.0001</b>      |
| 5 pulses per pulse group                  | 1.5677±0.0065                        | 1.5221±0.0070                           | <b>0.0009</b>      |
| Interpulse group intervals [ms]           |                                      |                                         |                    |
| 2 pulses per pulse group                  | 1.6194±0.0107                        | 1.5667±0.0061                           | <b>&lt;0.00001</b> |
| 3 pulses per pulse group                  | 1.5728±0.0090                        | 1.5684±0.0052                           | 0.6761             |
| 4 pulses per pulse group                  | 1.6640±0.0092                        | 1.6005±0.0054                           | <b>0.0001</b>      |
| 5 pulses per pulse group                  | 1.6487±0.0101                        | 1.6792±0.0124                           | 0.1323             |
| Number of pulses per call                 | 2.2428±0.0276                        | 2.2661±0.0153                           | 0.4681             |
| Pulse rate [n per s]                      | 1.6514±0.0096                        | 1.6928±0.0053                           | <b>0.0003</b>      |
| Dominant frequency [Hz]                   | 3.1250±0.0050                        | 3.1122±0.0027                           | <b>0.0282</b>      |
